# Supplementary material for: New one-pot method for the synthesis of pyrrolidinofullerenes
Source: Royal Society of Chemistry journal article supplement (doi:10.1039/c6ra15519g), 2016-01-01
Supplement: c6ra15519g1.pdf [file c6ra15519g1.pdf]

## Supporting Information

### New one-pot method for the synthesis of pyrrolidinofullerenes

A. R. Tuktarov,<sup>1\*</sup> Z. R. Shakirova,<sup>1</sup> Yu. G. Budnikova,<sup>2</sup> R. B. Salihov<sup>3</sup> and U. M. Dzhemilev<sup>1</sup>

<sup>1</sup> *Institute of Petrochemistry and Catalysis, Russian Academy of Sciences*

*141 Prospekt Oktyabrya, Ufa, 450075, Russia, e-mail: tuktarovar@gmail.com*

<sup>2</sup> *Arbuzov Institute of Organic and Physical Chemistry, Kazan Research Center, Russian Academy of Sciences, 8 Akademik Arbuzov Str., Kazan, 420088 Russia*

<sup>3</sup> *Bashkir State University, 32 Zaki Validi Str., Ufa, 450076, Russia*

#### TABLE OF CONTENTS

| Contents                                                  | Page number |
|-----------------------------------------------------------|-------------|
| 1) General considerations, and experimental procedures    | 2           |
| 2) <sup>1</sup> H, <sup>13</sup> C, HSQC and HMBC spectra | 4-24        |

**General considerations.** Commercially available [60]fullerene and methyl or ethyl isocyanoacetates (99.5% pure, Sigma-Aldrich) was used. The reaction products were analyzed on a HPLC chromatograph HEWLETT PACKARD (model HP 1090 Liquid Chromatograph) at 340 nm. The mixtures were separated on a metal preparative column Cosmosil Buckyprep Waters (250×10 mm) at ~20 °C. Toluene was used as eluent, the flow rate was 3.0 mL·min<sup>-1</sup>. The <sup>1</sup>H and <sup>13</sup>C NMR spectra were run on a Bruker Avance-500 spectrometer at 500.17 and 125.78 MHz, respectively. The mixture of CDCl<sub>3</sub> and CS<sub>2</sub> (1:5) was used as a solvent. The mass spectra were obtained on a MALDI TOF/TOF Autoflex-III Bruker and UltraFlex III TOF/TOF (Bruker Daltonik GmbH, Germany) operating in a linear mode. S<sub>8</sub> and DCTB (trans-2-[3-(4-tert-butylphenyl)-2-methyl-2-propenylidene]malononitrile) are used as a matrix. For the application on a metal target, the toluene solutions of the samples were used.

**General synthetic procedure.** A 50 mL glass reactor was charged with C<sub>60</sub> (20 mg, 0.0278 mmol) in dry chlorobenzene (3 mL), Ti(Oi-Pr)<sub>4</sub> (0.04 mL, 0.14 mmol) and methyl or ethyl isocyanoacetate (0.2 mmol) under a dried argon atmosphere at 0 °C. The resulting solution was heated to 80 °C, and RMgBr (1 M solution in diethyl ether, 0.334 mmol) was added dropwise during 2—3 min. The reaction mixture stirred for 15 min and was quenched with an 8-10% (aq) solution of HCl. The layers were separated and the organic layer passed through a column with small amount of silica gel. The reaction products **1-6**, and the starting fullerene C<sub>60</sub> were separated by the semi-preparative HPLC, eluent was toluene.

**Electrochemistry.** All experiments were carried out under a dry argon atmosphere. Bu<sub>4</sub>NBF<sub>4</sub> was purchased from Aldrich and was used without further purification. Anhydrous solvent dichlorobenzene (Acros Organics) was obtained by distillation over phosphoric anhydride. Cyclic voltammograms were recorded with a BASi Epsilon potentiostat (USA) at room temperature in o- dichlorobenzene (10<sup>-3</sup> M substrate concentration). 0.1 M Bu<sub>4</sub>NBF<sub>4</sub> was used as the supporting electrolyte and a glassy carbon electrode was used as a working electrode. The auxiliary electrode was a platinum rod. All potentials are referenced against the Ag/AgNO<sub>3</sub> redox couple and recalculated from Fc<sup>+</sup>/Fc. The scan rate was 100 mV·s<sup>-1</sup>.

### Electrophysics

Measure the resistance of the films was carried out using a digital meter resistance AKIP-8602 AKIP company. Accuracy of resistance measurement: ± 5%. On resistance is determined by the value of conductivity ( $G = 1/R$ ). The temperature was measured with a digital multimeter APPA-107N with an accuracy of about ± 1%.

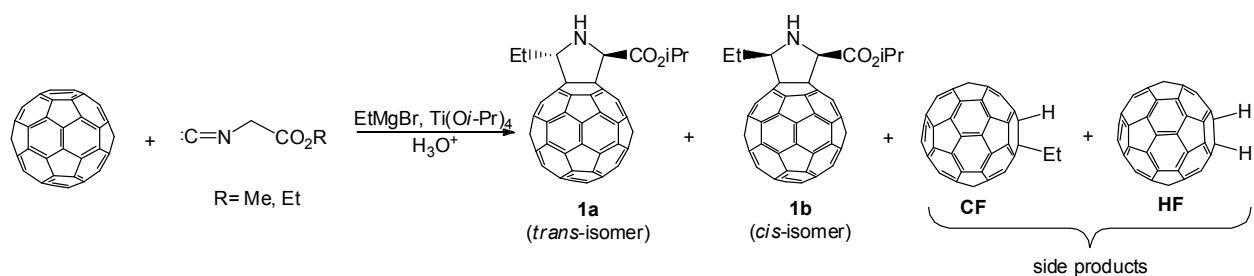

**Table 1.** Effect of the ratio of the reactant and catalyst components on the formation of the products reaction.

| $C_{60}$ : isocyanoacetate : [Mg] : [Ti] | Conversion $C_{60}$ , % | Ratio 1a : 1b : CF : HF                                      |
|------------------------------------------|-------------------------|--------------------------------------------------------------|
| 1 : 1 : 8 : 3                            | 100                     | Adducts of poly carbomagnesian and hydrogenation of $C_{60}$ |
| 1 : 2 : 8 : 3                            | 100                     | Adducts of poly carbomagnesian and hydrogenation of $C_{60}$ |
| <b>1 : 4 : 8 : 3</b>                     | <b>65</b>               | <b>1 : 2 : &lt;0.1 : &lt;0.1</b>                             |
| 1 : 6 : 8 : 3                            | 66                      | 1 : 2 : <0.1 : <0.1                                          |
| 1 : 4 : 1 : 1                            | 2-3                     | not calculated                                               |
| 1 : 4 : 2 : 1                            | 8                       | not calculated                                               |
| 1 : 4 : 4 : 2                            | 15                      | 1 : 2 : <0.1 : <0.1                                          |
| 1 : 4 : 6 : 1                            | 40                      | 1 : 2 : 10 : 0                                               |
| 1 : 4 : 6 : 2                            | 42                      | 1 : 2 : 3 : 1                                                |
| 1 : 4 : 6 : 3                            | 35                      | 1 : 2 : <1 : <1                                              |
| 1 : 4 : 10 : 4                           | 75                      | 1 : 2 : 2 : 6                                                |

Conditions: 80 °C, 15 min, solvent- dry chlorobenzene.

**Table 2.** Effect of temperature on the reaction pathway.

| Temperature, °C | Total yield 1a and 1b, % |
|-----------------|--------------------------|
| 20              | 0                        |
| 40              | 8                        |
| 60              | 15                       |
| 80              | 65                       |
| 100             | 63                       |

Conditions:  $C_{60}$  : isocyanoacetate : [Mg] : [Ti] ratio of 1 : 4 : 8 : 3, 15 min, solvent- dry chlorobenzene.

**Mixture of isomers of *iso*-propyl (2-ethyl-3,4-fullero[60]pyrrolidine-5-yl)-1*H*-carboxylates 1a+1b (cis/trans = 2:1).** IR: 527, 753, 1103, 1143, 1180, 1202, 1374, 1384, 1427, 1460, 1753, 3448  $\text{cm}^{-1}$ . UV ( $\text{CHCl}_3$ ),  $\lambda_{\text{max}}$ , nm: 256, 319, 429.  $^{15}\text{N}$  NMR (50.69 MHz,  $\text{CDCl}_3$ ):  $\delta$  55.17 (*trans*-isomer), 60.96 (*cis*-isomer).  $^1\text{H}$  NMR (500 MHz,  $\text{CDCl}_3$ ):  $\delta$  1.21 (d, 3H,  $\text{CH}_3$ , *i*-Pr (*trans*-isomer),  $J = 7.0$ ), 1.22 (d, 3H,  $\text{CH}_3$ , *i*-Pr (*cis*-isomer),  $J = 7.0$ ), 1.38 (d, 3H,  $\text{CH}_3$ , *i*-Pr (*cis*-isomer),  $J = 7.0$ ), 1.41 (d, 3H,  $\text{CH}_3$ , *i*-Pr (*trans*-isomer),  $J = 7.0$ ), 1.53 (t, 3H,  $\text{CH}_3$ , Et (*trans*-isomer),  $J = 7.0$ ), 1.58 (t, 3H,  $\text{CH}_3$ , Et (*cis*-isomer),  $J = 7.0$ ), 2.20 and 2.82 (both m, 2H,  $\text{CH}_2$ , Et (*cis*-isomer)), 2.32 and 2.58 (both m, 2H,  $\text{CH}_2$ , Et (*trans*-isomer)), 4.68 (dd, 1H, CH, pyrrolidine (*cis*-isomer),  $J = 2.0$ ,  $J = 7.0$ ), 5.17 (dd, 1H, CH, pyrrolidine (*trans*-isomer),  $J = 2.0$ ,  $J = 7.0$ ), 5.24 (m, 1H, CH, *i*-Pr (*cis*-isomer)), 5.26 (m, 1H, CH, *i*-Pr (*trans*-isomer)), 5.43 (s, 1H, CH, pyrrolidine (*cis*-isomer)), 5.56 (s, 1H, CH, pyrrolidine (*trans*-isomer)).  $^{13}\text{C}$  NMR (125 MHz,  $\text{CDCl}_3$ ):  $\delta$  13.01, 13.40, 21.89, 22.05, 22.08, 22.13, 26.90, 28.58, 69.77, 70.09, 72.32, 74.03, 74.20, 75.24, 76.77, 77.58, 78.34, 79.38, 135.07, 135.45, 135.84, 136.31, 136.39, 136.54, 136.74, 139.38, 139.49, 139.81, 140.02, 140.29, 140.32, 141.78, 141.85, 141.88, 141.89, 141.97, 142.02, 142.16, 142.20, 142.25, 142.30, 142.35, 142.53, 142.71, 142.75, 142.77, 142.81, 143.12, 143.16, 143.22, 143.28, 144.29, 144.34, 144.45, 144.49, 144.54, 144.57, 145.21, 145.24, 145.30, 145.33, 145.38, 145.45, 145.52, 145.58, 145.62, 145.71, 145.74, 145.88, 145.92, 146.02, 146.05, 146.10, 146.13, 146.26, 146.31, 146.39, 146.77, 147.03, 147.12, 147.23, 150.94, 151.46, 151.77, 152.38, 153.00, 153.33, 153.70, 154.96, 155.47, 168.76, 169.99. MALDI TOF:  $m/z$  found 878.044  $[\text{M}+\text{H}]^+$ , calc. 877.110 ( $\text{C}_{68}\text{H}_{15}\text{NO}_2$ ).

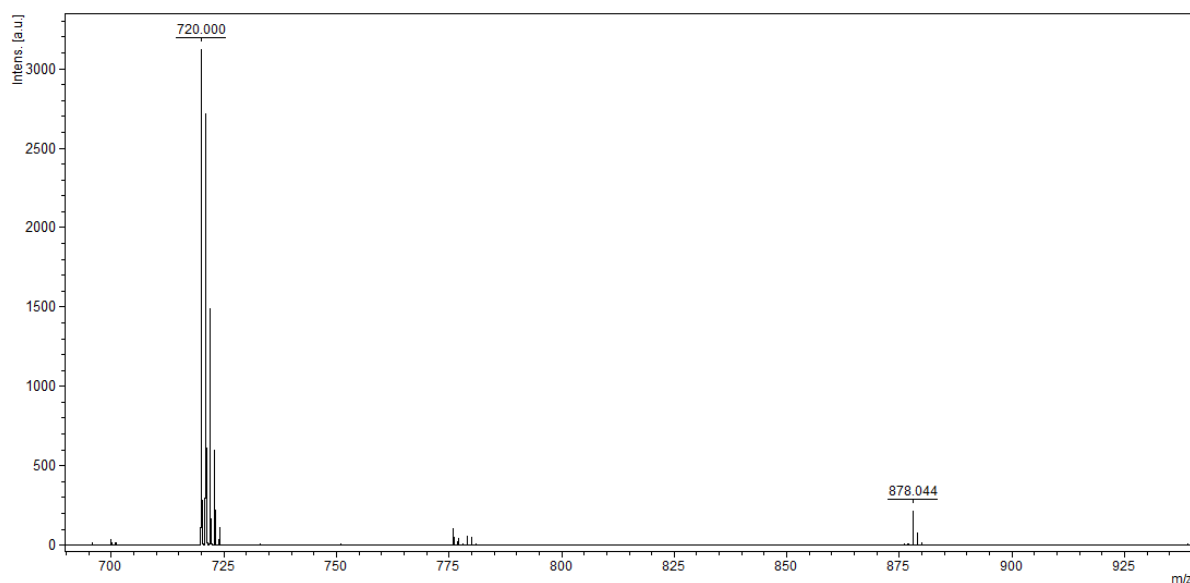

Figure 1. Mass spectra MALDI TOF of compound 1 (matrix –  $\text{S}_8$ ).

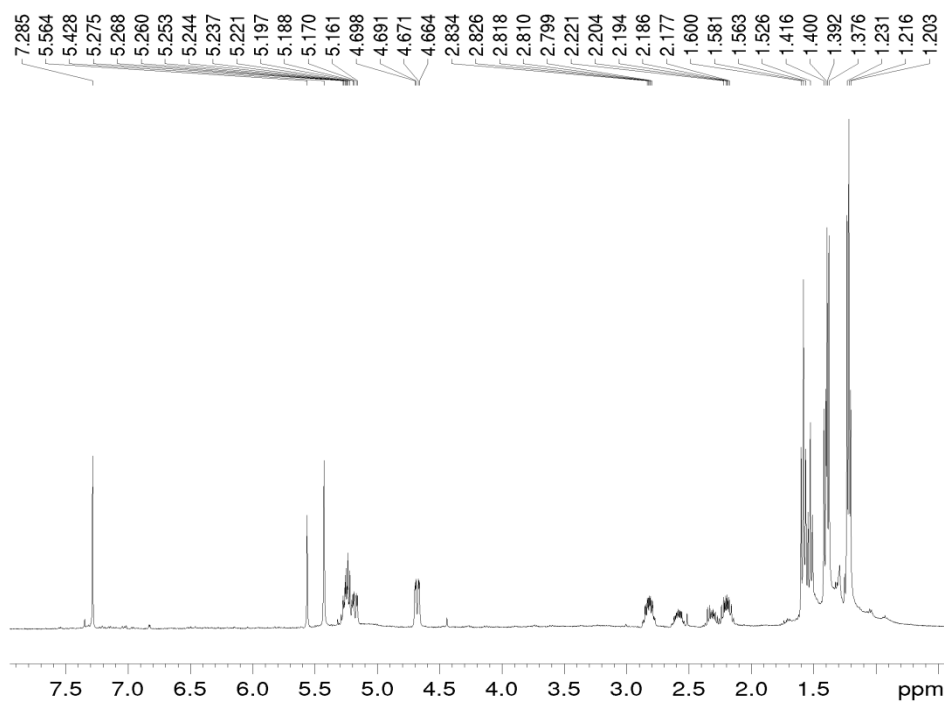

Figure 2. The <sup>1</sup>H NMR spectrum of compound **1** (500.17 MHz, solvent CS<sub>2</sub> : CDCl<sub>3</sub> = 5:1)

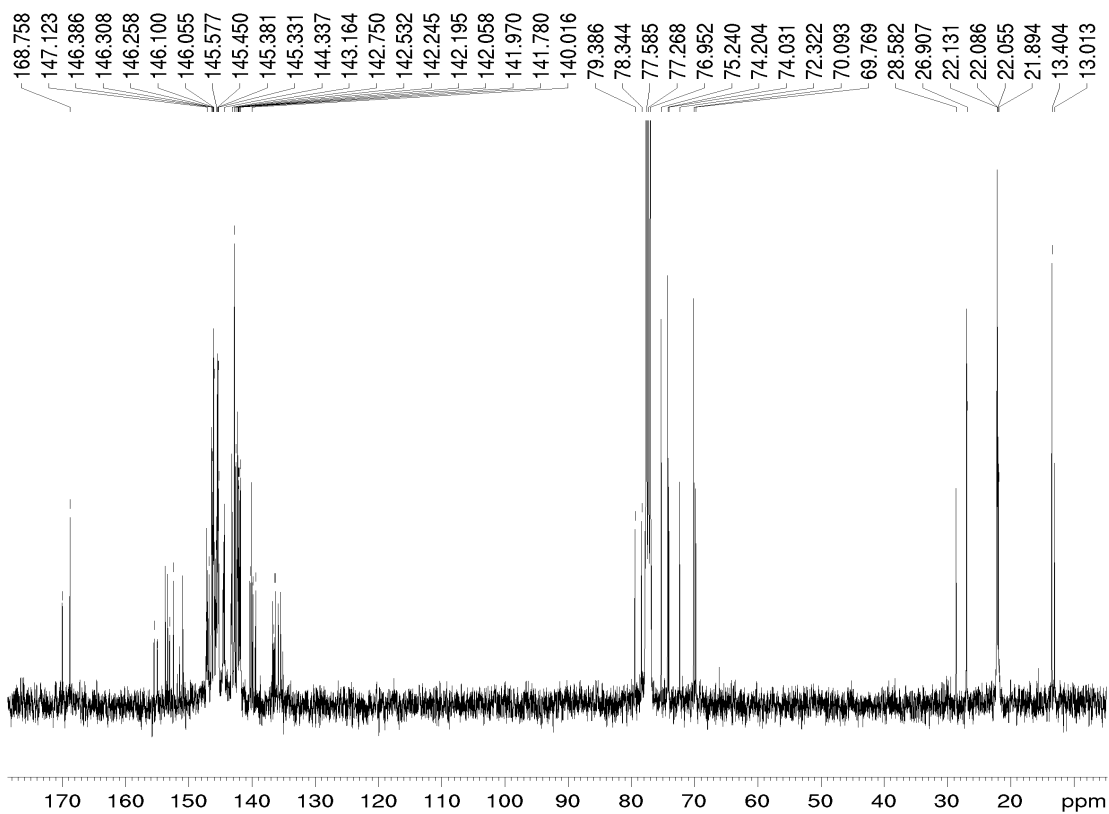

Figure 3. The <sup>13</sup>C NMR spectrum of compound **1** (125.78 MHz, solvent CS<sub>2</sub> : CDCl<sub>3</sub> = 5:1)

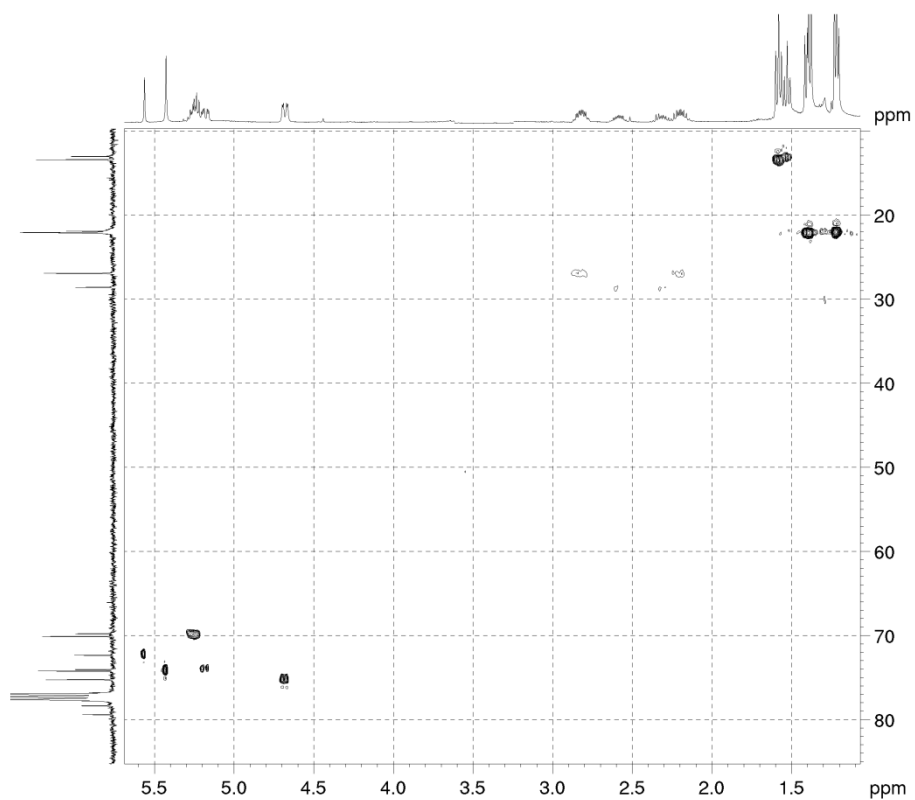

Figure 4. The HSQC spectrum of compound **1** (500.17 MHz for  $^1\text{H}$ , 125.78 MHz for  $^{13}\text{C}$ , solvent  $\text{CS}_2 : \text{CDCl}_3 = 5:1$ )

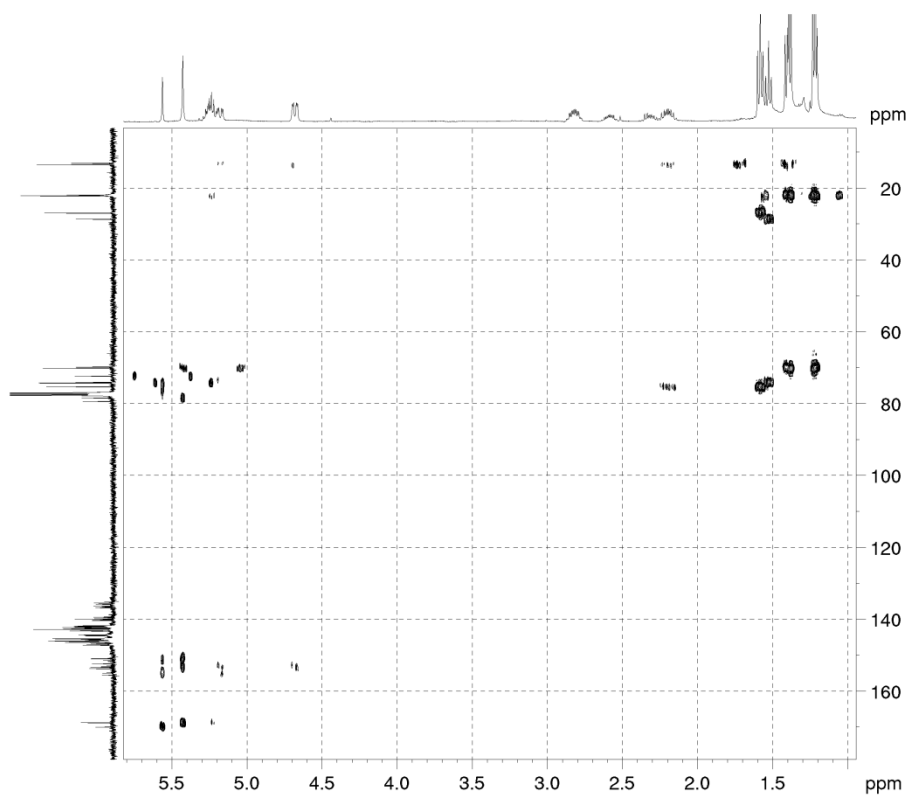

Figure 5. The HMBC spectrum of compound **1** (500.17 MHz for  $^1\text{H}$ , 125.78 MHz for  $^{13}\text{C}$ , solvent  $\text{CS}_2 : \text{CDCl}_3 = 5:1$ )

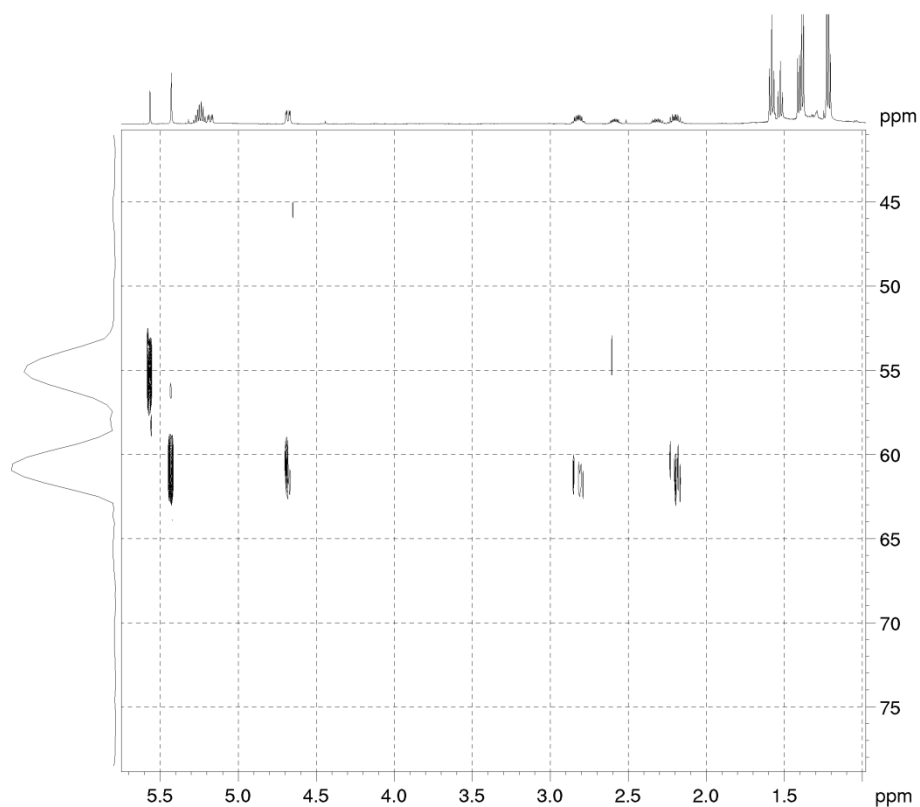

Figure 6. The  $^1\text{H}$ - $^{15}\text{N}$  HMBC spectrum of compound **1** (500.17 MHz for  $^1\text{H}$ , 50.69 MHz for  $^{15}\text{N}$ , solvent  $\text{CS}_2 : \text{CDCl}_3 = 5:1$ )

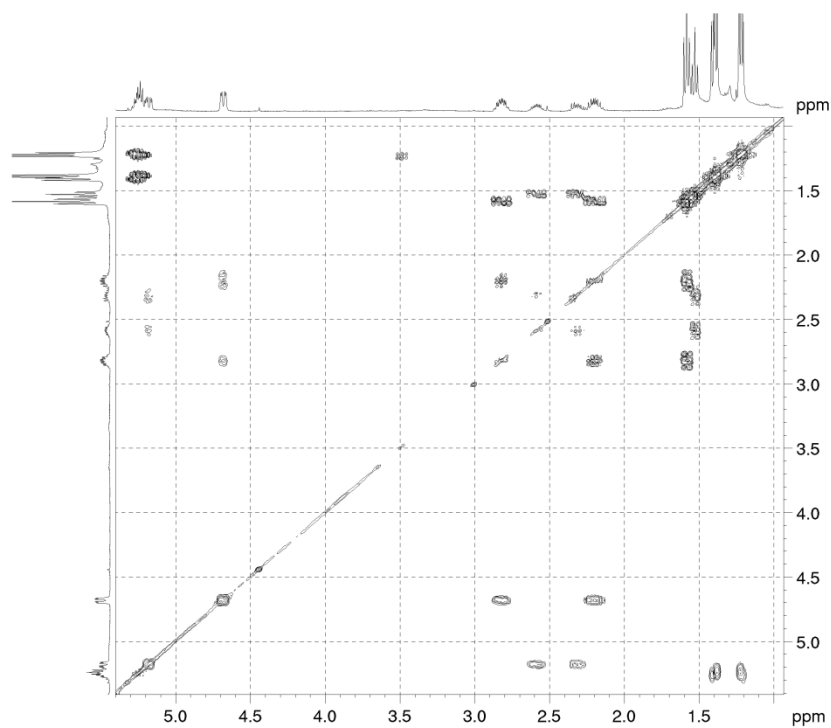

Figure 7. The H-H COSY spectrum of compound **1** (500.17 MHz for  $^1\text{H}$ , solvent  $\text{CS}_2 : \text{CDCl}_3 = 5:1$ )

**Mixture of isomers of *iso*-propyl (2-butyl-3,4-fullero[60]pyrrolidine-5-yl)-1*H*-carboxylates 2a+2b (cis/trans = 3:2).** IR: 527, 1104, 1195, 1373, 1384, 1462, 1737, 3435  $\text{cm}^{-1}$ . UV ( $\text{CHCl}_3$ ),  $\lambda_{\text{max}}$ , nm: 258, 329, 429.  $^1\text{H}$  NMR (500 MHz,  $\text{CDCl}_3$ ):  $\delta$  1.09 (t, 3H,  $\text{CH}_3$ , Bu (*cis*-isomer),  $J = 7.0$ ), 1.13 (t, 3H,  $\text{CH}_3$ , Bu (*trans*-isomer),  $J = 7.0$ ), 1.20 (d, 3H,  $\text{CH}_3$ , *i*-Pr (*trans*-isomer),  $J = 7.0$ ), 1.21 (d, 3H,  $\text{CH}_3$ , *i*-Pr (*cis*-isomer),  $J = 7.0$ ), 1.37 (d, 3H,  $\text{CH}_3$ , *i*-Pr (*cis*-isomer),  $J = 7.0$ ), 1.40 (d, 3H,  $\text{CH}_3$ , *i*-Pr (*trans*-isomer),  $J = 7.0$ ), 1.64 (m, 2H,  $\text{CH}_2$ , Bu (*cis*-isomer)), 1.89 (m, 2H,  $\text{CH}_2$ , Bu (*cis*-isomer)), 2.91 (m, 2H,  $\text{CH}_2$ , Bu (*trans*-isomer)), 2.09 (m, 2H,  $\text{CH}_2$ , Bu (*trans*-isomer)), 2.18 and 2.73 (both m, 2H,  $\text{CH}_2$ , Bu (*cis*-isomer)), 2.28 and 2.53 (both m, 2H,  $\text{CH}_2$ , Bu (*trans*-isomer)), 4.78 (dd, 1H, CH, pyrrolidine (*cis*-isomer),  $J = 2.0$ ,  $J = 7.0$ ), 5.22 (dd, 1H, CH, pyrrolidine (*trans*-isomer),  $J = 2.0$ ,  $J = 7.0$ ), 5.24 (m, 1H, CH, *i*-Pr (*cis*-isomer)), 5.28 (m, 1H, CH, *i*-Pr (*trans*-isomer)), 5.43 (s, 1H, CH, pyrrolidine (*cis*-isomer)), 5.58 (s, 1H, CH, pyrrolidine (*trans*-isomer)).  $^{13}\text{C}$  NMR (125 MHz,  $\text{CDCl}_3$ ):  $\delta$  14.44, 14.53, 21.86, 22.03, 22.07, 22.12, 23.19, 23.37, 30.49, 30.86, 33.30, 34.88, 69.76, 70.11, 72.34, 72.41, 73.60, 74.22, 76.68, 77.73, 78.23, 79.45, 135.45, 135.84, 136.31, 136.71, 139.36, 139.80, 140.02, 140.29, 141.78, 141.87, 141.90, 141.96, 142.06, 142.15, 142.20, 142.25, 142.30, 142.35, 142.53, 142.74, 142.77, 142.80, 143.11, 143.16, 143.27, 144.29, 144.33, 144.45, 144.49, 144.54, 145.20, 145.24, 145.32, 145.38, 145.44, 145.50, 145.57, 145.71, 145.77, 145.80, 145.91, 145.98, 146.02, 146.05, 146.13, 146.25, 146.31, 146.34, 146.38, 146.77, 147.03, 147.12, 147.24, 150.96, 151.53, 152.40, 153.00, 153.32, 153.68, 155.07, 155.36, 168.81, 170.10. MALDI TOF:  $m/z$  found 903.085 [ $\text{M}-2\text{H}$ ], calc. 905.905 ( $\text{C}_{70}\text{H}_{19}\text{NO}_2$ ).

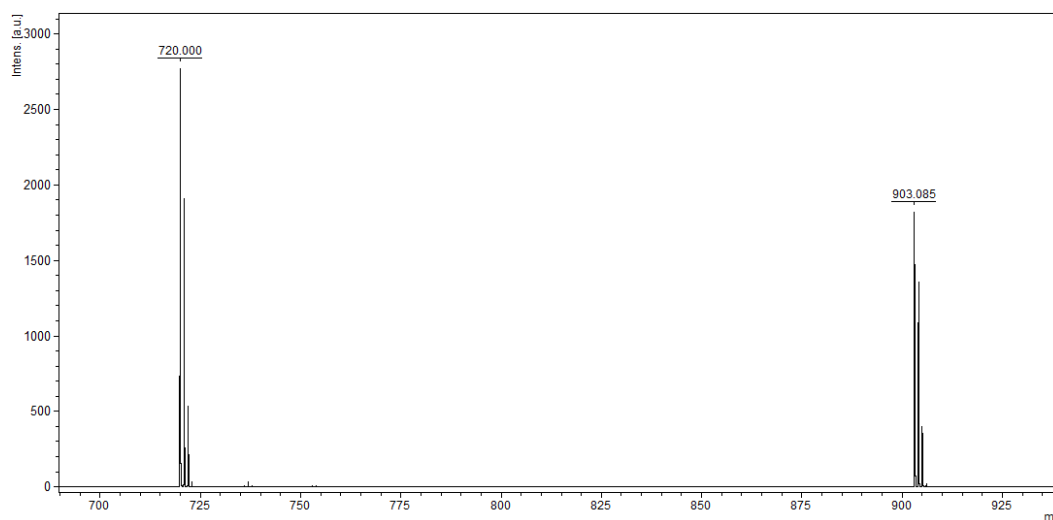

Figure 8. Mass spectra MALDI TOF of compound **2** (matrix –  $\text{S}_8$ ).



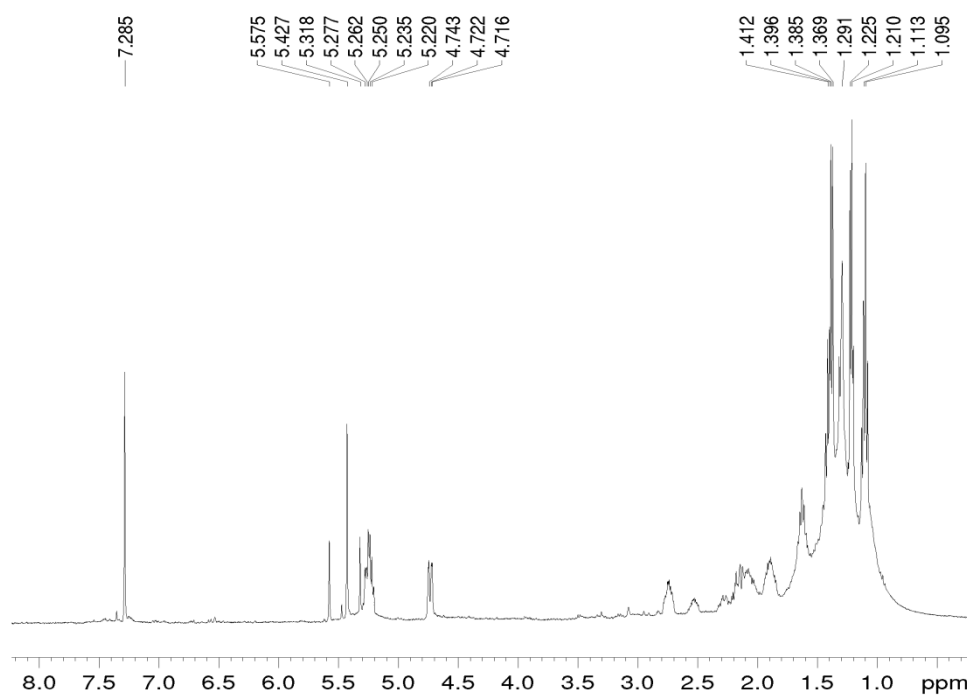

Figure 9. The  $^1\text{H}$  NMR spectrum of compound **2** (500.17 MHz, solvent  $\text{CS}_2 : \text{CDCl}_3 = 5:1$ )

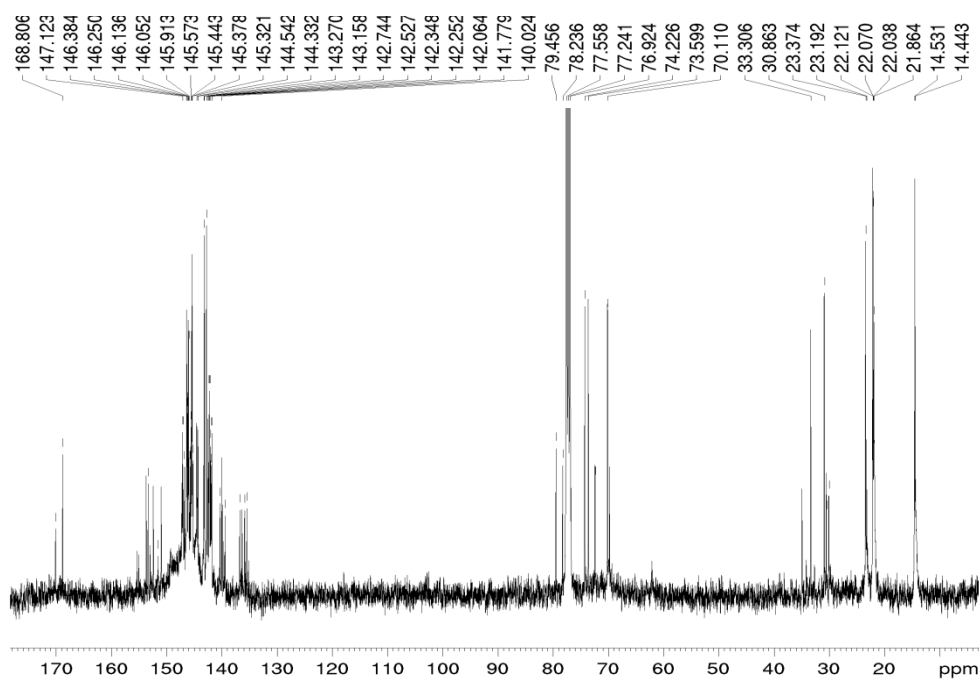

Figure 10. The  $^{13}\text{C}$  NMR spectrum of compound **2** (125.78 MHz, solvent  $\text{CS}_2 : \text{CDCl}_3 = 5:1$ )

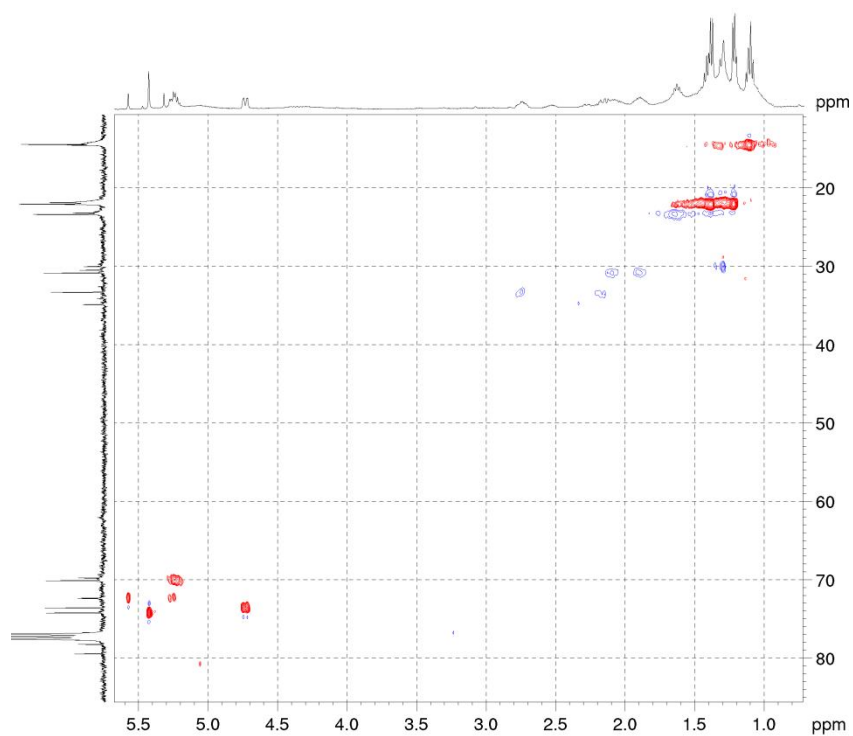

Figure 11. The HSQC spectrum of compound **2** (500.17 MHz for  $^1\text{H}$ , 125.78 MHz for  $^{13}\text{C}$ , solvent  $\text{CS}_2 : \text{CDCl}_3 = 5:1$ )

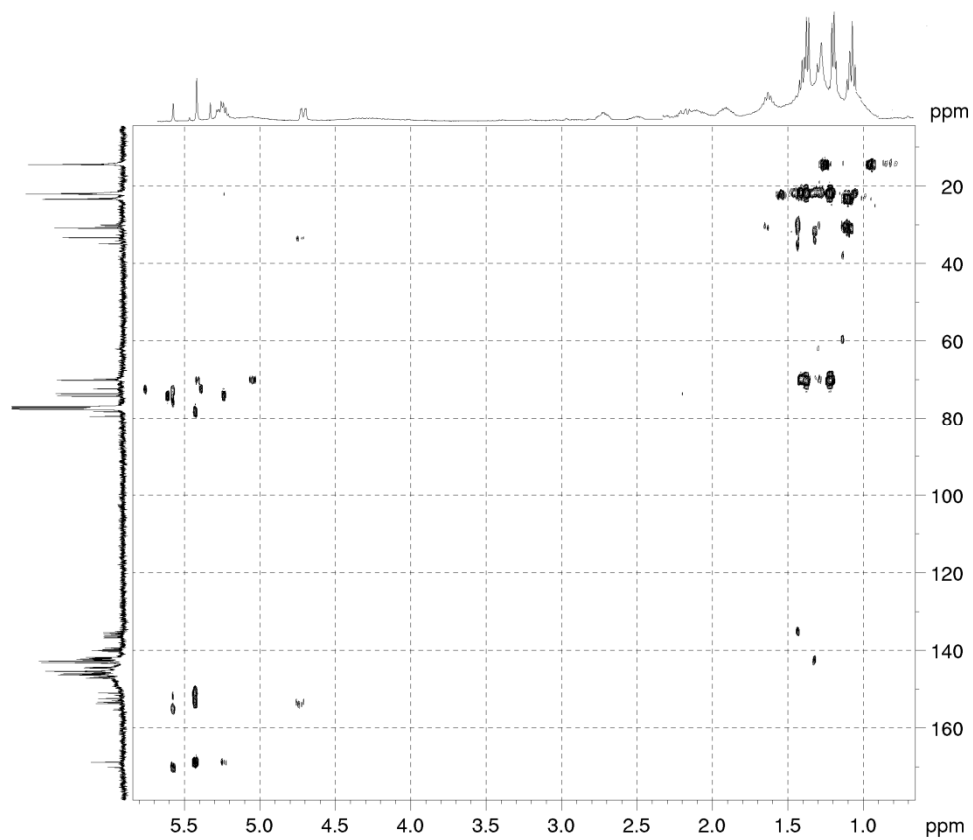

Figure 12. The HMBC spectrum of compound **2** (500.17 MHz for  $^1\text{H}$ , 125.78 MHz for  $^{13}\text{C}$ , solvent  $\text{CS}_2 : \text{CDCl}_3 = 5:1$ )

**Mixture of isomers of *iso*-propyl (2-*iso*-propyl-3,4-fullero[60]pyrrolidine-5-yl)-1*H*-carboxylates 3a+3b (cis/trans = 1:1).** IR: 527, 731, 1103, 1187, 1204, 1372, 1384, 1428, 1462, 1736, 3441  $\text{cm}^{-1}$ . UV ( $\text{CHCl}_3$ ),  $\lambda_{\text{max}}$ , nm: 257, 308, 429.  $^1\text{H}$  NMR (500 MHz,  $\text{CDCl}_3$ ):  $\delta$  1.19 (d, 3H,  $\text{CH}_3$ , *i*-Pr (*trans*-isomer),  $J = 7.0$ ), 1.22 (d, 3H,  $\text{CH}_3$ , *i*-Pr (*cis*-isomer),  $J = 7.0$ ), 1.38 (d, 3H,  $\text{CH}_3$ , *i*-Pr (*cis*-isomer),  $J = 7.0$ ), 1.41 (d, 3H,  $\text{CH}_3$ , *i*-Pr (*trans*-isomer),  $J = 7.0$ ), 1.49 (d, 3H,  $\text{CH}_3$ , *i*-Pr (*trans*-isomer),  $J = 7.0$ ), 1.53 (d, 3H,  $\text{CH}_3$ , *i*-Pr (*cis*-isomer),  $J = 7.0$ ), 1.60 (d, 6H,  $2\text{CH}_3$ , *i*-Pr (*trans* and *cis*-isomers),  $J = 7.0$ ), 2.89 (m, H, CH, *i*-Pr (*cis*-isomer)), 2.99 (m, H, CH, *i*-Pr (*trans*-isomer)), 4.62 (d, 1H, CH, pyrrolidine (*cis*-isomer),  $J = 3.6$ ), 5.06 (d, 1H, CH, pyrrolidine (*trans*-isomer),  $J = 5.2$ ), 5.21 (m, 2H,  $2\text{CH}$ , *i*-Pr (*cis*+*trans*-isomer)), 5.35 (s, 1H, CH, pyrrolidine (*cis*-isomer)), 5.52 (s, 1H, CH, pyrrolidine (*trans*-isomer)).  $^{13}\text{C}$  NMR (125 MHz,  $\text{CDCl}_3$ ):  $\delta$  19.46, 19.49, 21.94, 22.09, 22.15, 22.18, 23.74, 24.06, 29.58, 32.32, 69.71, 69.98, 73.00, 73.96, 78.34, 79.40, 77.12, 77.69, 78.68, 134.64, 135.41, 135.61, 135.83, 136.35, 136.44, 136.74, 139.38, 139.43, 139.81, 139.93, 140.06, 140.13, 141.74, 141.78, 141.84, 141.88, 141.91, 142.00, 142.21, 142.24, 142.27, 142.30, 142.38, 142.51, 142.55, 142.71, 142.76, 142.81, 143.15, 143.18, 143.26, 143.34, 144.31, 144.33, 144.41, 144.51, 144.55, 144.60, 145.22, 145.33, 145.36, 145.40, 145.44, 145.50, 145.52, 145.57, 145.68, 145.75, 145.86, 145.93, 146.03, 146.27, 146.31, 146.35, 146.40, 146.65, 146.98, 147.06, 147.08, 147.18, 151.06, 151.67, 152.42, 153.09, 153.77, 154.10, 155.01, 156.20, 168.61, 169.74. MALDI TOF,  $m/z$  891.1 [ $\text{M}$ ].

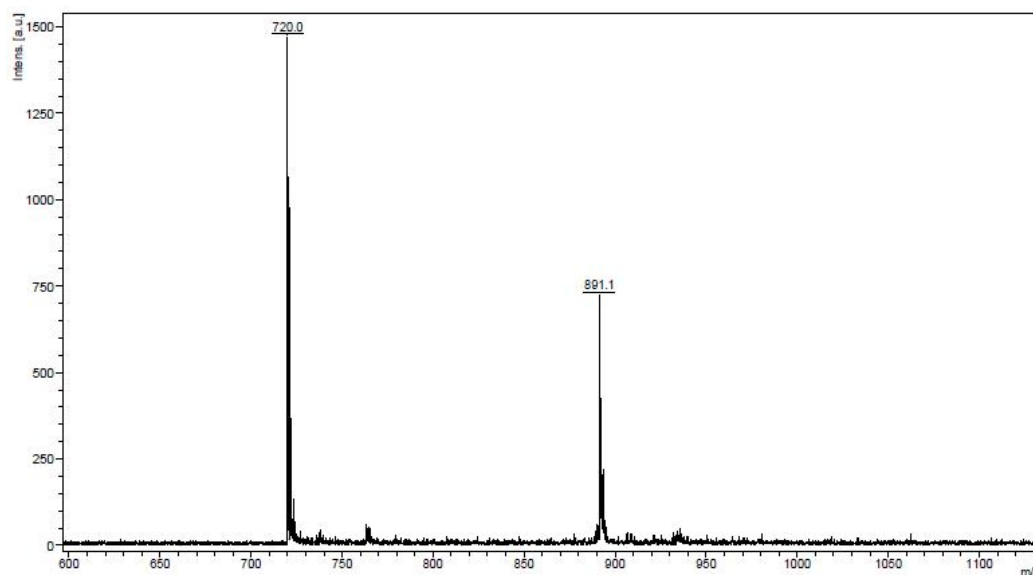

Figure 13. Mass spectra MALDI TOF/TOF of compound **3** (matrix – DCTB).

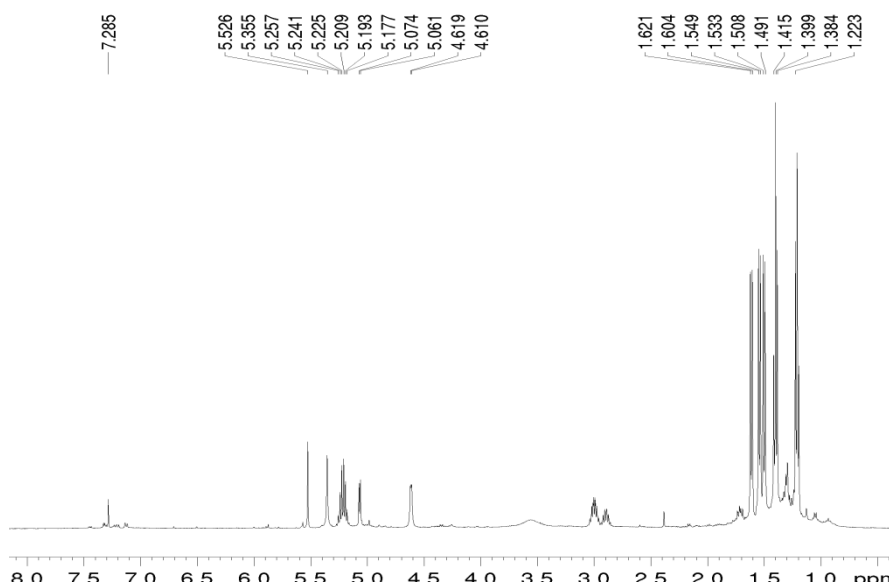

Figure 14. The  $^1\text{H}$  NMR spectrum of compound **3** (400.13 MHz, solvent  $\text{CS}_2 : \text{CDCl}_3 = 5:1$ )

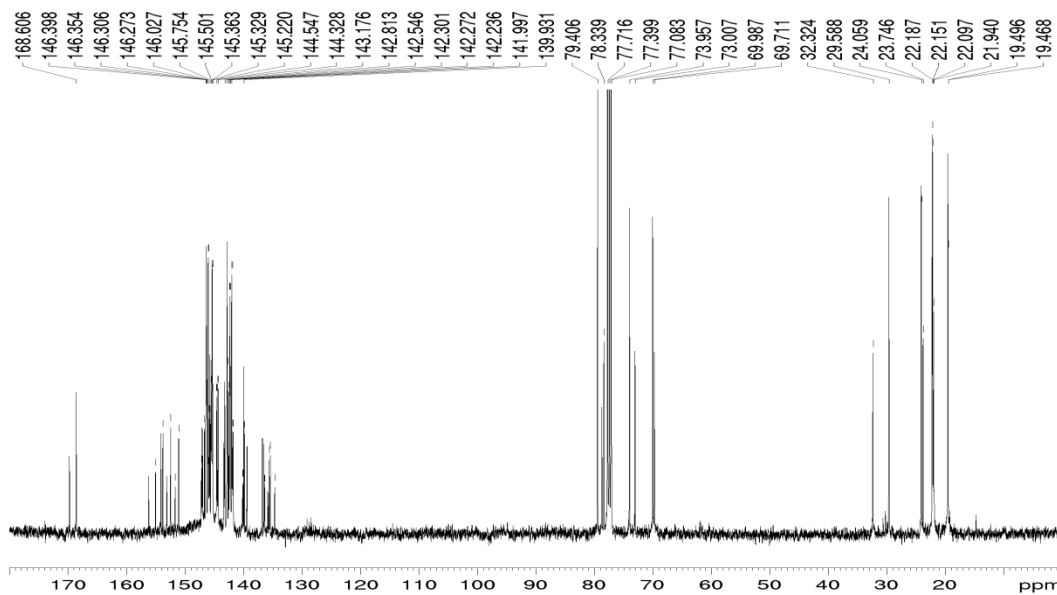

Figure 15. The  $^{13}\text{C}$  NMR spectrum of compound **3** (100.62 MHz, solvent  $\text{CS}_2 : \text{CDCl}_3 = 5:1$ )

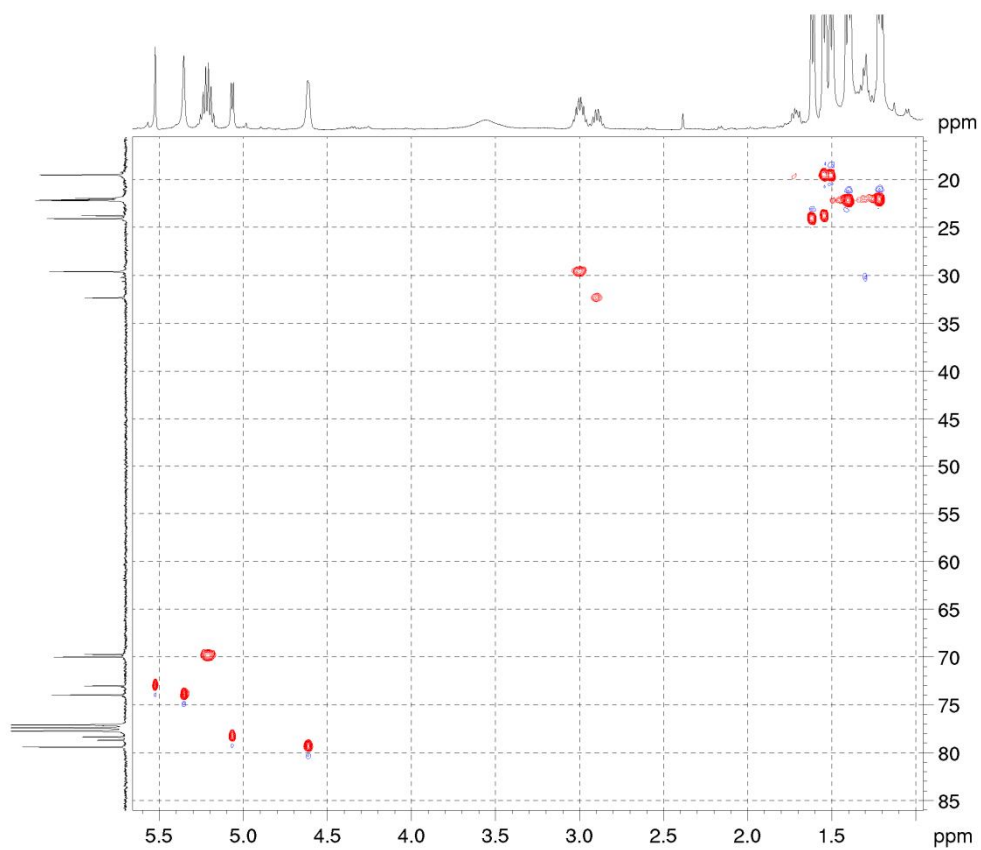

Figure 16. The HSQC spectrum of compound **3** (400.13 MHz for  $^1\text{H}$ , 100.62 MHz for  $^{13}\text{C}$ , solvent  $\text{CS}_2 : \text{CDCl}_3 = 5:1$ )

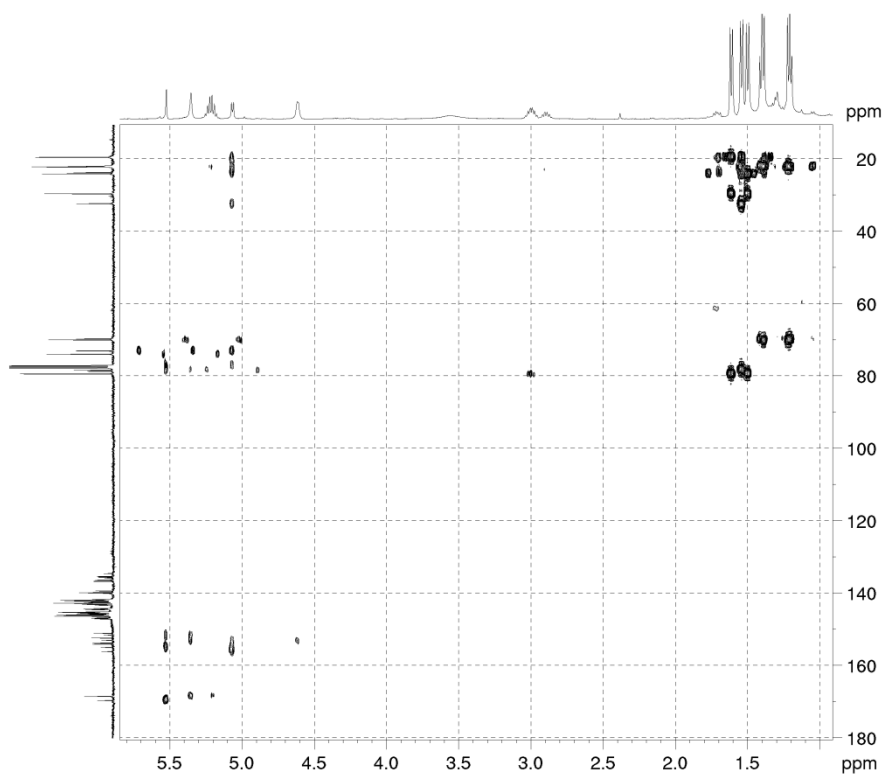

Figure 17. The HMBC spectrum of compound **3** (400.13 MHz for  $^1\text{H}$ , 100.62 MHz for  $^{13}\text{C}$ , solvent  $\text{CS}_2 : \text{CDCl}_3 = 5:1$ )

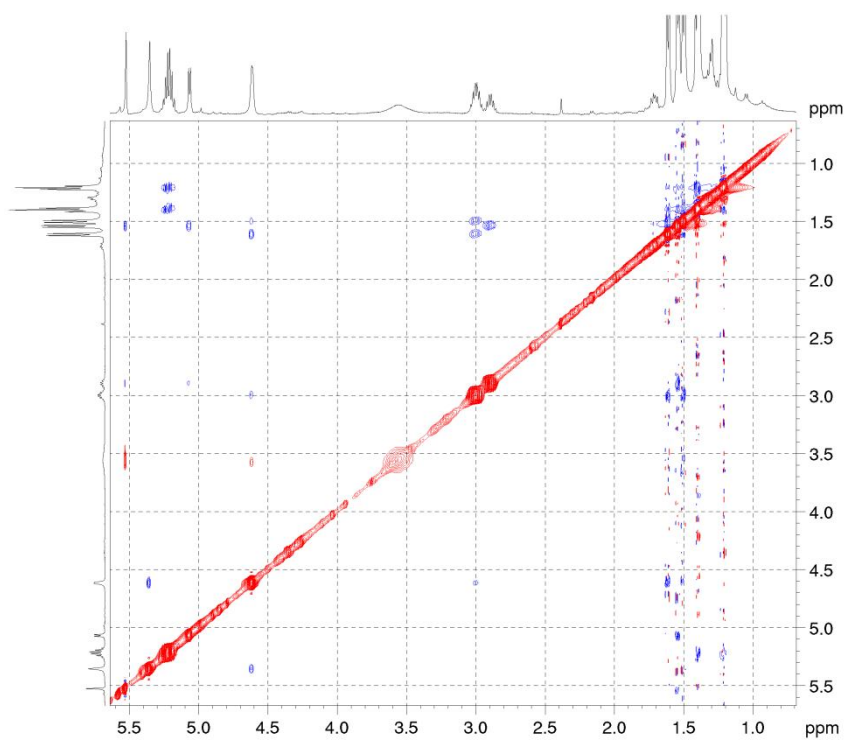

Figure 18. The NOESY spectrum of compound **3** (400.13 MHz for <sup>1</sup>H, solvent CS<sub>2</sub> : CDCl<sub>3</sub> = 5:1)

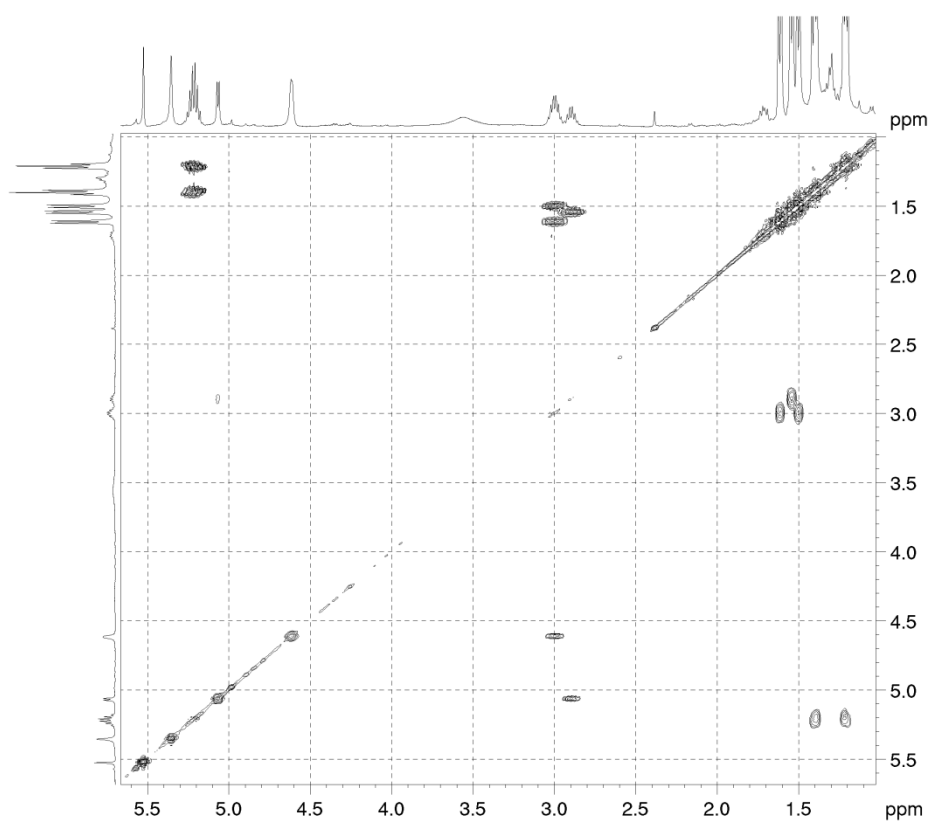

Figure 19. The H-H COSY spectrum of compound **3** (400.13 MHz for <sup>1</sup>H, solvent CS<sub>2</sub> : CDCl<sub>3</sub> = 5:1)

**Mixture of isomers of *iso*-propyl (2-*cyclo*-hexyl-3,4-fullero[60]pyrrolidine-5-yl)-1*H*-carboxylates 4a+4b (cis/trans = 10:8).** IR: 527, 732, 1102, 1280, 1480, 1729, 3435  $\text{cm}^{-1}$ . UV ( $\text{CHCl}_3$ ),  $\lambda_{\text{max}}$ , nm: 258, 330, 429.  $^1\text{H}$  NMR (500 MHz,  $\text{CDCl}_3$ ):  $\delta$  1.20 (d, 3H,  $\text{CH}_3$ , *i*-Pr (*trans*-isomer),  $J = 7.0$ ), 1.24 (d, 3H,  $\text{CH}_3$ , *i*-Pr (*cis*-isomer),  $J = 7.0$ ), 1.37 (d, 3H,  $\text{CH}_3$ , *i*-Pr (*cis*-isomer),  $J = 7.0$ ), 1.40 (d, 3H,  $\text{CH}_3$ , *i*-Pr (*trans*-isomer),  $J = 7.0$ ), 1.5-2.4 (m, 22H, 10 $\text{CH}_2$ , 2CH, 2Cy), 4.59 (d, 1H, CH, pyrrolidine (*cis*-isomer),  $J = 3.6$ ), 5.05 (d, 1H, CH, pyrrolidine (*trans*-isomer),  $J = 3.6$ ), 5.21-5.27 (m, 2H, 2CH, *i*-Pr (*cis*+*trans*-isomer)), 5.37 (s, 1H, CH, pyrrolidine (*cis*-isomer)), 5.54 (s, 1H, CH, pyrrolidine (*trans*-isomer)).  $^{13}\text{C}$  NMR (125 MHz,  $\text{CDCl}_3$ ):  $\delta$  21.14, 21.75, 21.78, 21.87, 21.99, 22.04, 22.06, 22.13, 26.17, 26.53, 26.67, 26.74, 26.83, 26.87, 29.61, 30.02, 69.85, 70.11, 73.12, 73.43, 73.98, 75.66, 77.80, 78.51, 78.79, 86.07, 140.36, 140.69, 141.06, 141.75, 141.80, 141.83, 141.87, 141.97, 141.99, 142.05, 142.11, 142.18, 142.25, 142.29, 142.40, 142.44, 142.51, 142.68, 142.78, 142.80, 142.88, 143.16, 143.22, 143.27, 143.33, 144.31, 144.33, 144.39, 144.50, 144.53, 144.59, 145.21, 145.26, 145.43, 145.45, 145.51, 145.74, 14.02, 146.25, 146.30, 146.33, 146.40, 147.01, 147.08, 147.16, 150.59, 151.06, 152.32, 153.71, 154.02, 154.34, 154.93, 155.49, 168.92, 169.06.

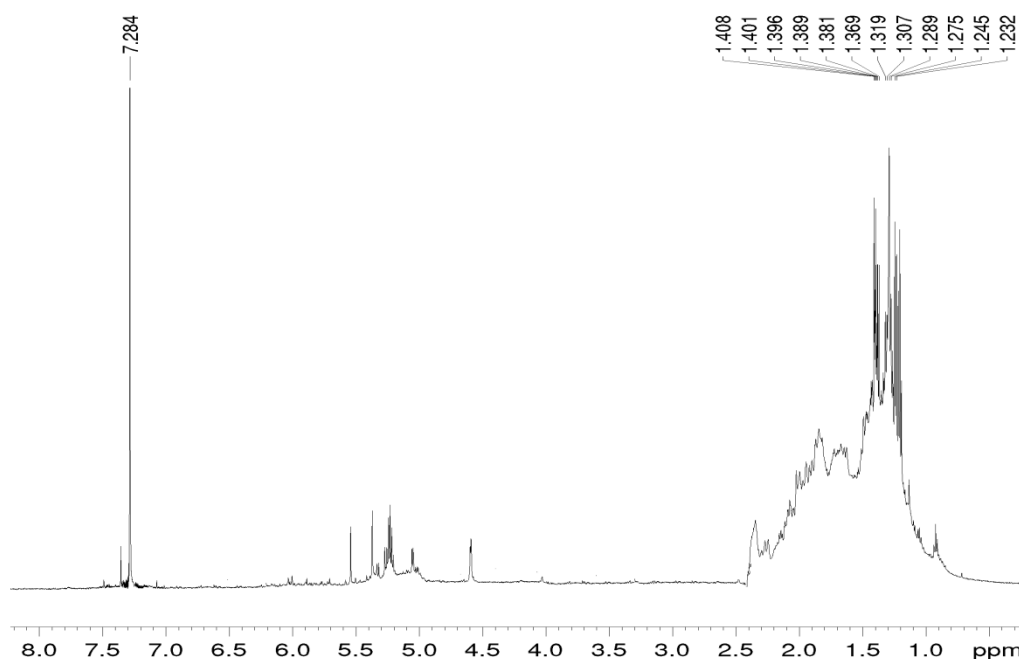

Figure 20. The  $^1\text{H}$  NMR spectrum of compound 4 (500.17 MHz, solvent  $\text{CS}_2 : \text{CDCl}_3 = 5:1$ )

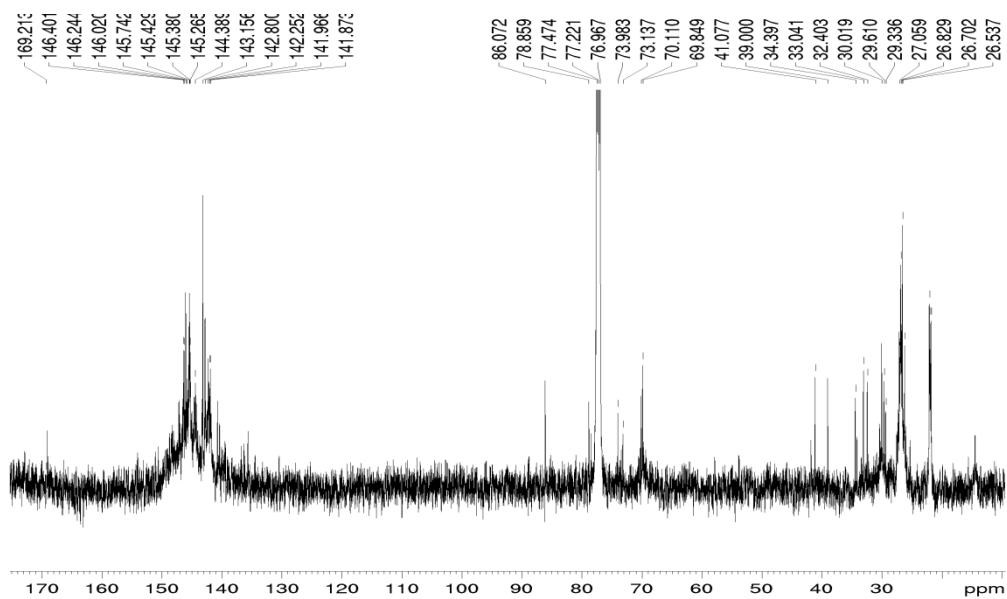

Figure 21. The  $^{13}\text{C}$  NMR spectrum of compound 4 (125.78 MHz, solvent  $\text{CS}_2 : \text{CDCl}_3 = 5:1$ )

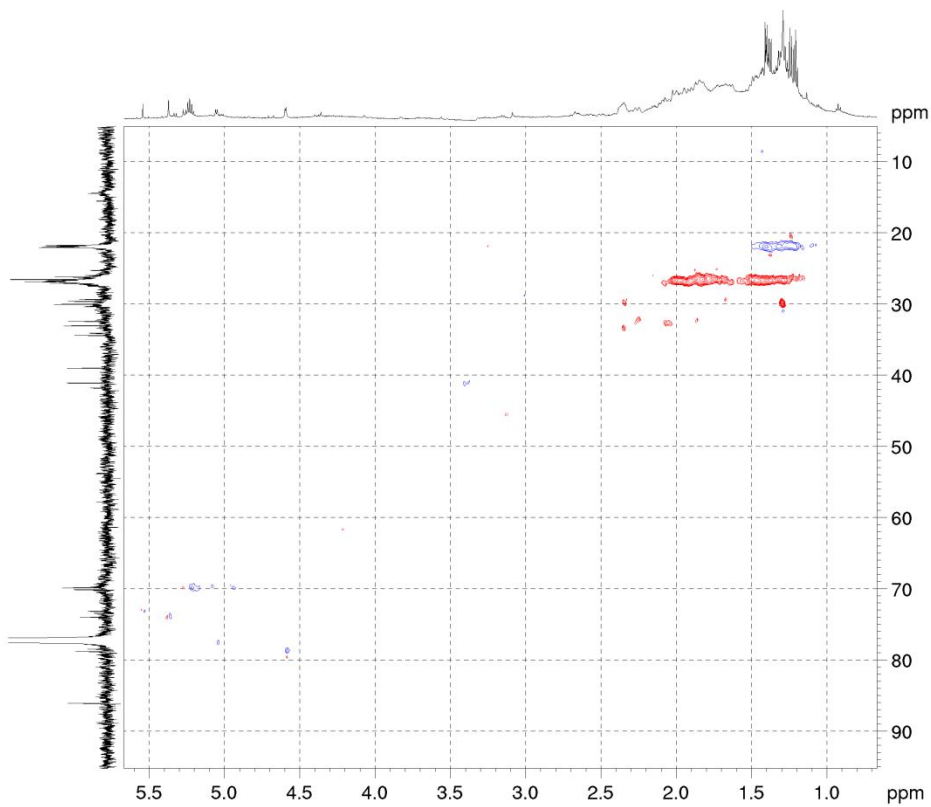

Figure 22. The HSQC spectrum of compound 4 (500.17 MHz for  $^1\text{H}$ , 125.78 MHz for  $^{13}\text{C}$ , solvent  $\text{CS}_2 : \text{CDCl}_3 = 5:1$ )



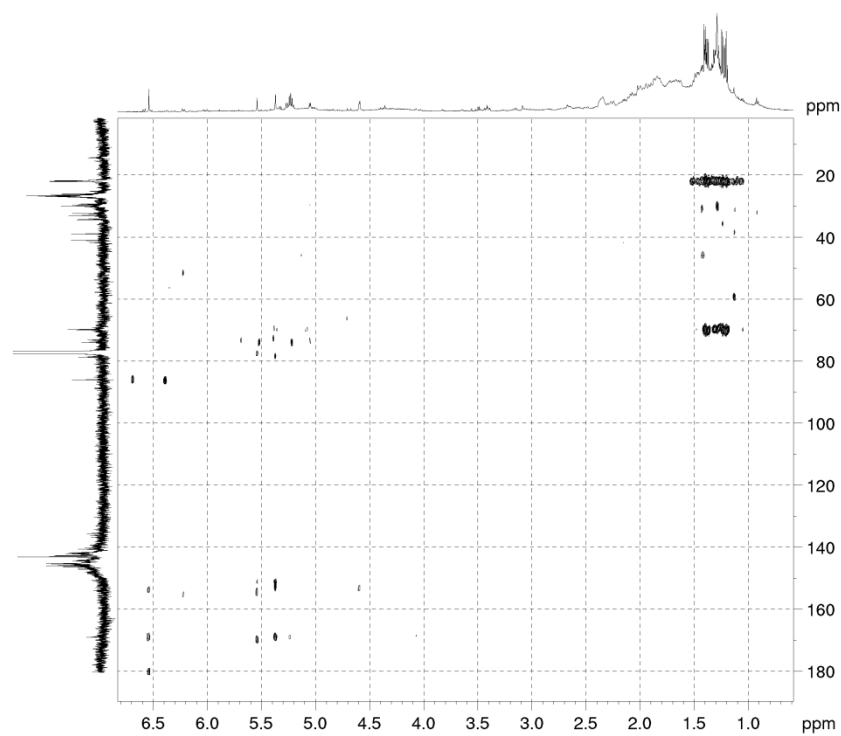

Figure 23. The HMBC spectrum of compound 4 (500.17 MHz for  $^1\text{H}$ , 125.78 MHz for  $^{13}\text{C}$ , solvent  $\text{CS}_2 : \text{CDCl}_3 = 5:1$ )

**trans iso-Propyl (2-phenyl-3,4-fullero[60]pyrrolidine-5-yl)-1H-carboxylates 5.** IR: 527, 732, 1102, 1182, 1261, 1429, 1461, 1731, 3445  $\text{cm}^{-1}$ . UV ( $\text{CHCl}_3$ ),  $\lambda_{\text{max}}$ , nm: 254, 329, 429.  $^1\text{H}$  NMR (500 MHz,  $\text{CDCl}_3$ ):  $\delta$  1.23 (d, 3H,  $\text{CH}_3$ , i-Pr,  $J = 7.0$ ), 1.45 (d, 3H,  $\text{CH}_3$ , i-Pr,  $J = 7.0$ ), 1.71 (broad s, 1H, NH), 5.34 (m, 1H, CH, i-Pr), 5.74 (s, 1H, CH, pyrrolidine), 6.54 (s, 1H, CH, pyrrolidine), 7.35 (d, 1H, CH, Ph,  $J = 7.0$ ), 7.43 (t, 2H, 2CH, Ph,  $J = 7.0$ ), 7.87 (d, 2H, 2CH, Ph,  $J = 7.0$ ).  $^{13}\text{C}$  NMR (125 MHz,  $\text{CDCl}_3$ ):  $\delta$  21.75, 22.23, 69.68, 70.72, 73.26, 74.24, 75.87, 128.54, 128.62, 128.73, 135.69, 135.83, 136.37, 136.49, 138.15, 139.58, 139.70, 140.08, 140.14, 141.64, 141.79, 141.92, 142.06, 142.13, 142.15, 142.22, 142.30, 142.36, 142.68, 142.73, 142.80, 143.14, 143.18, 144.33, 144.57, 144.67, 144.92, 145.25, 145.34, 145.40, 145.51, 145.55, 145.59, 145.72, 146.01, 146.04, 146.12, 146.15, 146.26, 146.29, 146.42, 146.45, 146.55, 146.78, 147.25, 147.44, 151.77, 153.16, 154.01, 156.14, 171.83. MALDI TOF,  $m/z$  925.1  $[\text{M}]^-$ .

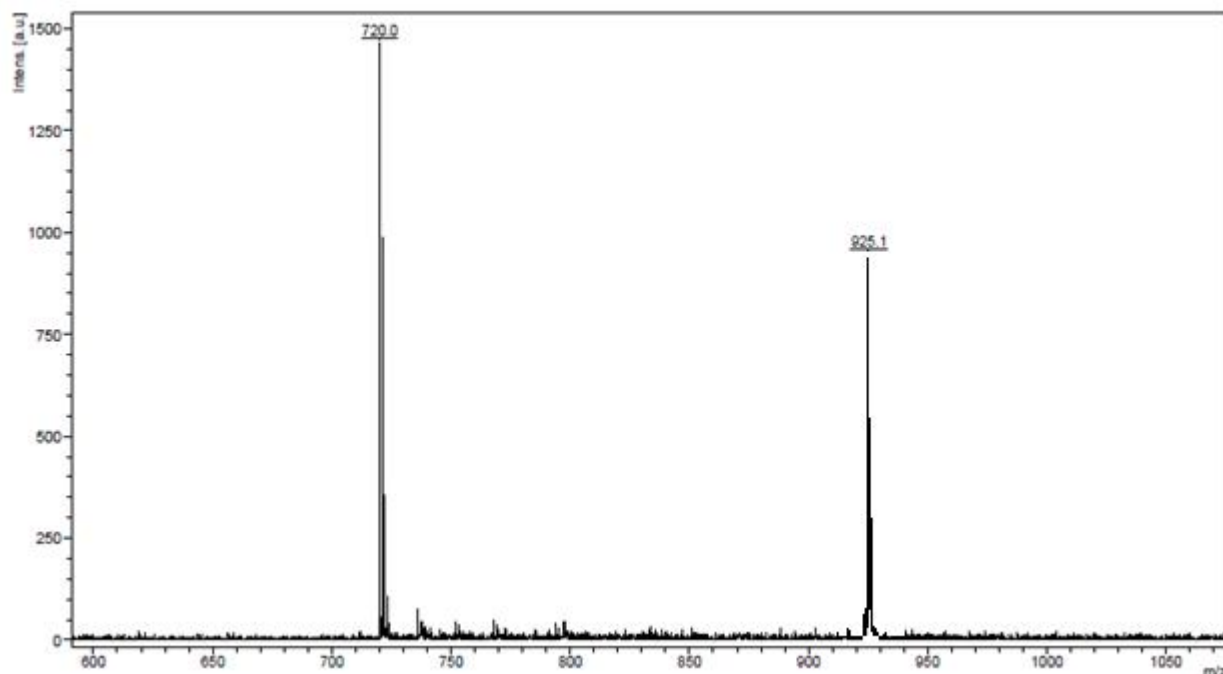

Figure 24. Mass spectra MALDI TOF/TOF of compound **5** (matrix – DCTB).

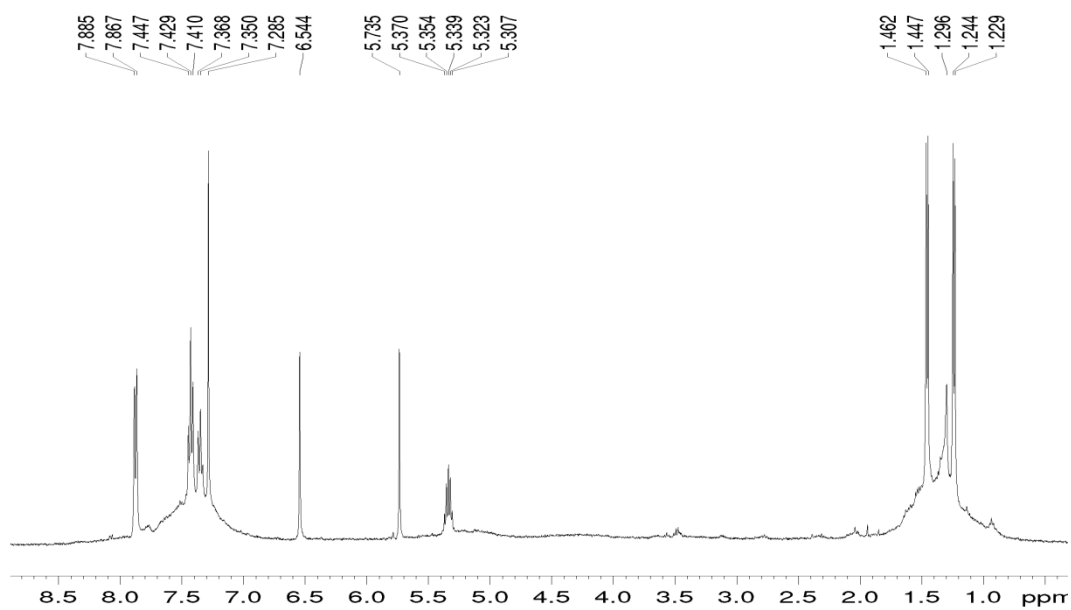

Figure 25. The <sup>1</sup>H NMR spectrum of compound **5** (400.13 MHz, solvent CS<sub>2</sub> : CDCl<sub>3</sub> = 5:1)

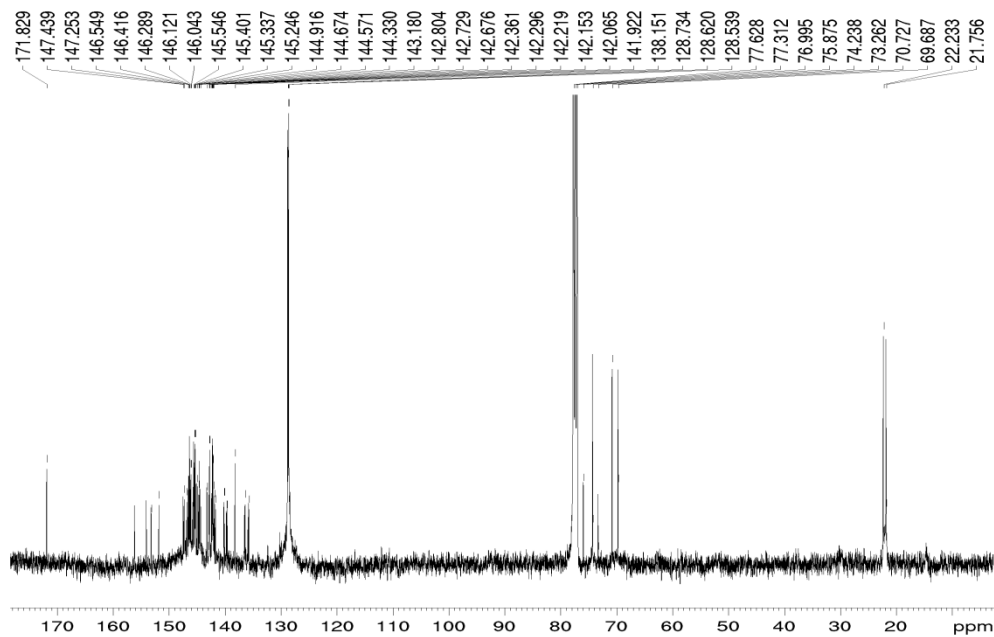

Figure 26. The <sup>13</sup>C NMR spectrum of compound **5** (100.62 MHz, solvent CS<sub>2</sub> : CDCl<sub>3</sub> = 5:1)

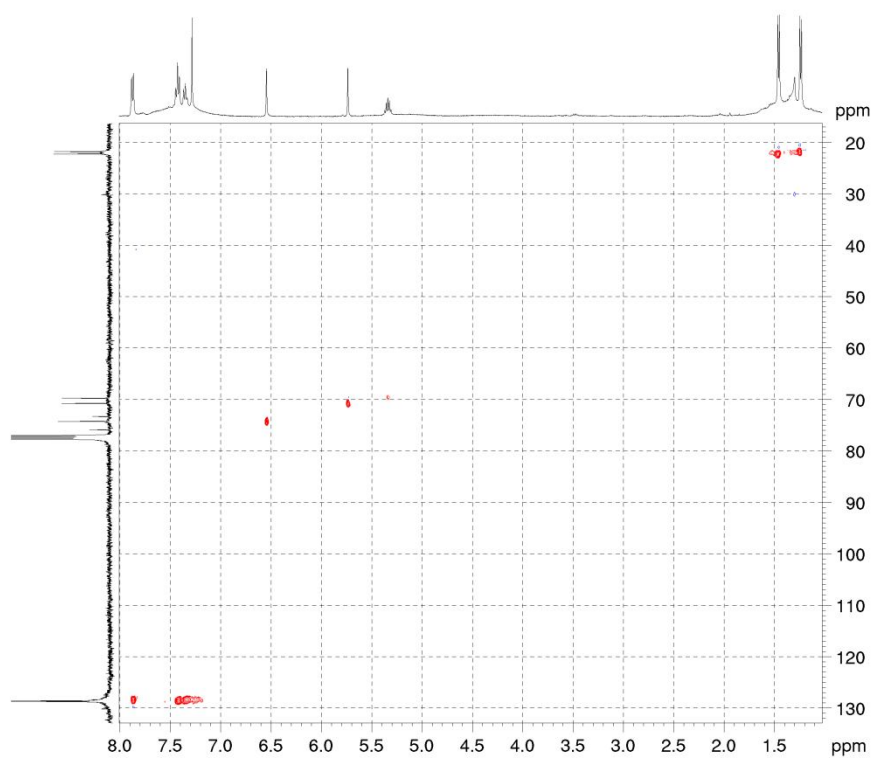

Figure 27. The HSQC spectrum of compound **5** (400.13 MHz for  $^1\text{H}$ , 100.62 MHz for  $^{13}\text{C}$ , solvent  $\text{CS}_2 : \text{CDCl}_3 = 5:1$ )

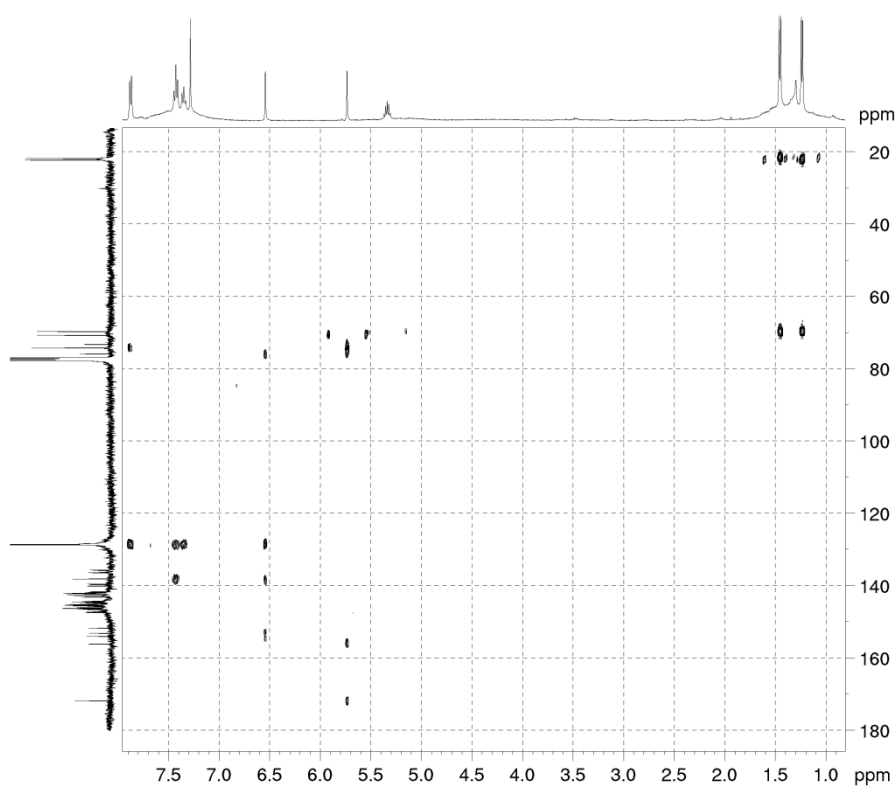

Figure 28. The HMBC spectrum of compound **5** (400.13 MHz for  $^1\text{H}$ , 100.62 MHz for  $^{13}\text{C}$ , solvent  $\text{CS}_2 : \text{CDCl}_3 = 5:1$ )

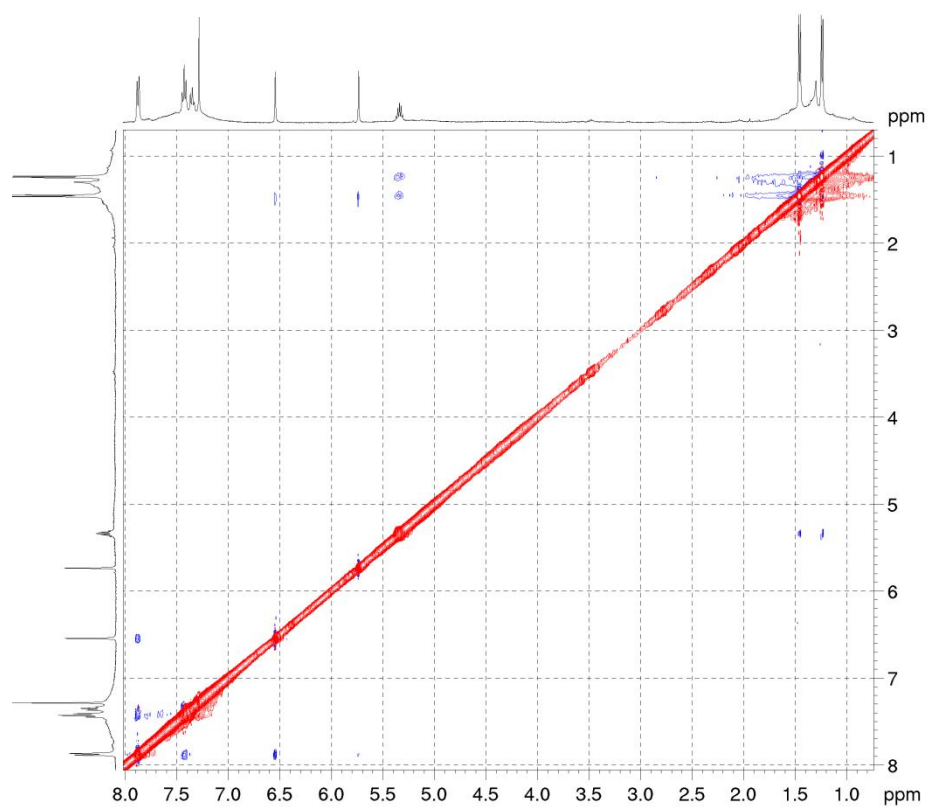

Figure 29. The NOESY spectrum of compound **5** (400.13 MHz for <sup>1</sup>H, solvent CS<sub>2</sub> : CDCl<sub>3</sub> = 5:1)

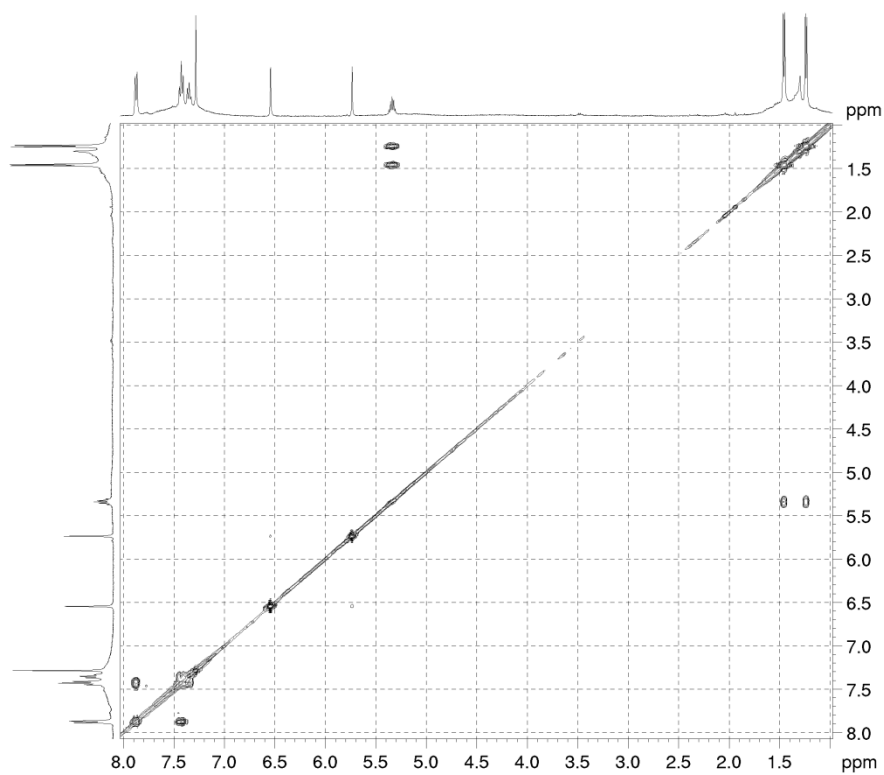

Figure 30. The H-H COSY spectrum of compound **5** (400.13 MHz for <sup>1</sup>H, solvent CS<sub>2</sub> : CDCl<sub>3</sub> = 5:1)

**Mixture of isomers of *iso*-propyl (2-(*o*-tolyl)-3,4-fullero[60]pyrrolidine-5-yl)-1*H*-carboxylates 6a+6b (cis/trans = 1:2).** IR: 527, 731, 758, 1103, 1183, 1202, 1373, 1429, 1461, 1488, 1735, 3438  $\text{cm}^{-1}$ . UV ( $\text{CHCl}_3$ ),  $\lambda_{\text{max}}$ , nm: 257, 331, 429.  $^1\text{H}$  NMR (500 MHz,  $\text{CDCl}_3$ ):  $\delta$  1.24 (d, 3H,  $\text{CH}_3$ , *i*-Pr (*trans*-isomer),  $J = 7.0$ ), 1.25 (d, 3H,  $\text{CH}_3$ , *i*-Pr (*cis*-isomer),  $J = 7.0$ ), 1.42 (d, 3H,  $\text{CH}_3$ , *i*-Pr (*cis*-isomer),  $J = 7.0$ ), 1.46 (d, 3H,  $\text{CH}_3$ , *i*-Pr (*trans*-isomer),  $J = 7.0$ ), 2.64 (s, 3H,  $\text{CH}_3$ , *trans*-isomer), 2.65 (s, 3H,  $\text{CH}_3$ , *cis*-isomer), 5.04 (dd, 1H, CH, pyrrolidine (*cis*-isomer),  $J = 2.0$ ,  $J = 7.0$ ), 5.11 (dd, 1H, CH, pyrrolidine (*trans*-isomer),  $J = 2.0$ ,  $J = 7.0$ ), 5.27 (m, 1H, 1CH, *i*-Pr (*cis*-isomer)), 5.32 (m, 1H, 1CH, *i*-Pr (*cis*-isomer)), 5.59 (s, 1H, CH, pyrrolidine (*cis*-isomer)), 5.72 (s, 1H, CH, pyrrolidine (*trans*-isomer)), 7.00-8.25 (m, 8H, 8CH, 2Ph).  $^{13}\text{C}$  NMR (125 MHz,  $\text{CDCl}_3$ ):  $\delta$  21.78, 21.91, 21.97, 22.07, 22.13, 22.25, 69.61, 69.64, 70.13, 70.49, 71.79, 73.25, 73.66, 75.88, 76.42, 79.62, 126.58, 126.83, 127.69, 127.85, 128.26, 128.45, 128.81, 130.46, 130.60, 130.71, 131.01, 131.36, 136.29, 136.44, 136.58, 136.99, 139.68, 139.78, 139.84, 140.00, 140.07, 140.16, 141.66, 141.78, 141.98, 142.11, 142.14, 142.20, 142.32, 142.68, 142.73, 143.06, 143.17, 144.16, 144.28, 144.32, 144.40, 144.43, 144.53, 144.57, 144.63, 144.90, 145.21, 145.24, 145.26, 145.32, 145.41, 145.44, 145.49, 145.60, 145.65, 145.71, 145.74, 145.98, 146.03, 146.10, 146.15, 146.21, 146.23, 146.28, 146.31, 146.40, 146.92, 147.03, 147.06, 147.17, 147.24, 147.42, 151.18, 151.76, 152.87, 153.27, 153.65, 154.21, 156.44, 168.64, 171.94.

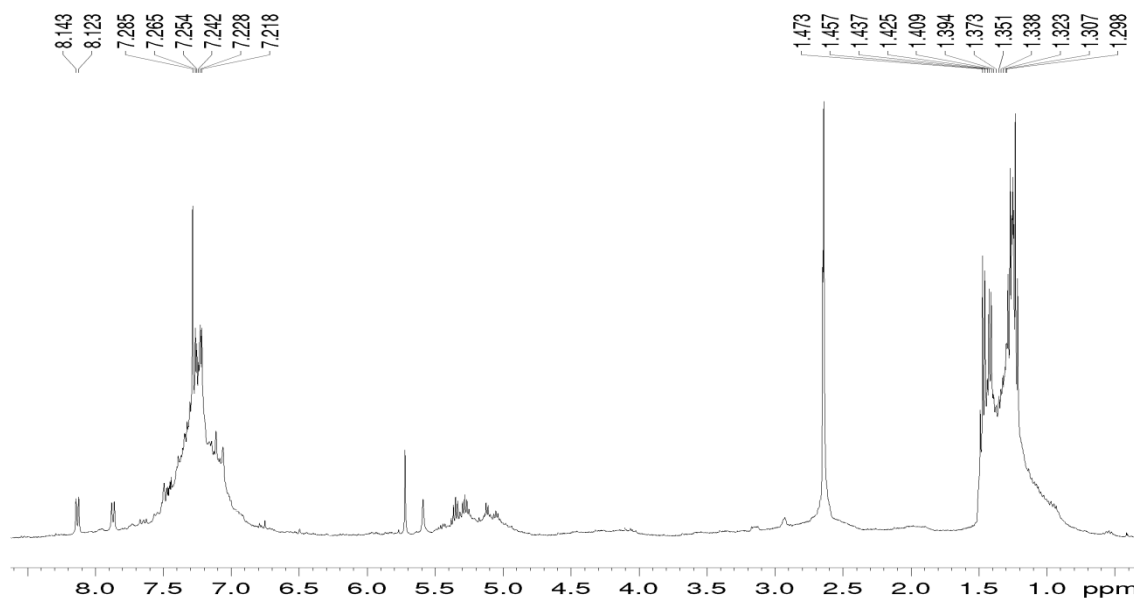

Figure 31. The  $^1\text{H}$  NMR spectrum of compound **6** (400.13 MHz, solvent  $\text{CS}_2 : \text{CDCl}_3 = 5:1$ )

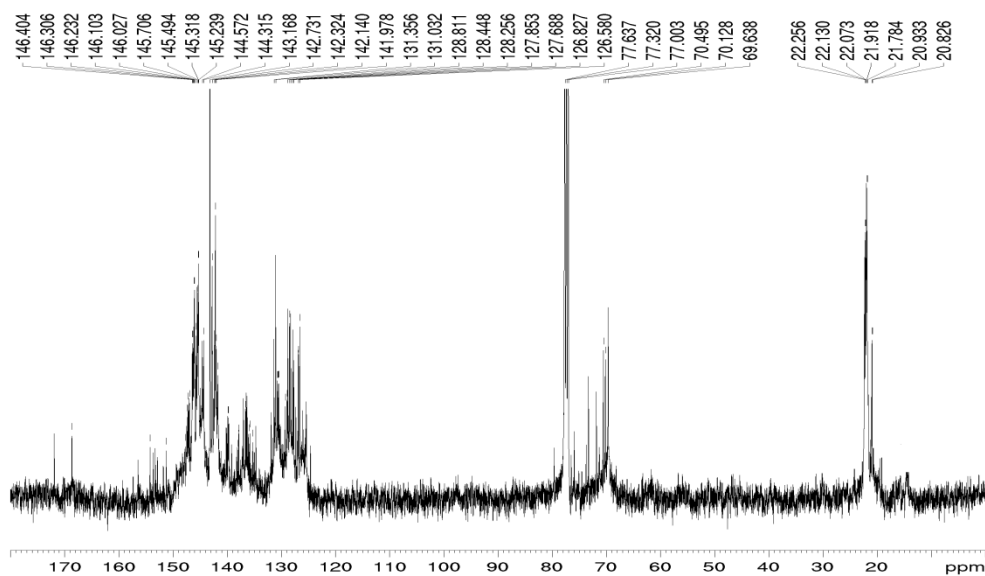

Figure 32. The  $^{13}\text{C}$  NMR spectrum of compound **6** (100.62 MHz, solvent  $\text{CS}_2 : \text{CDCl}_3 = 5:1$ )

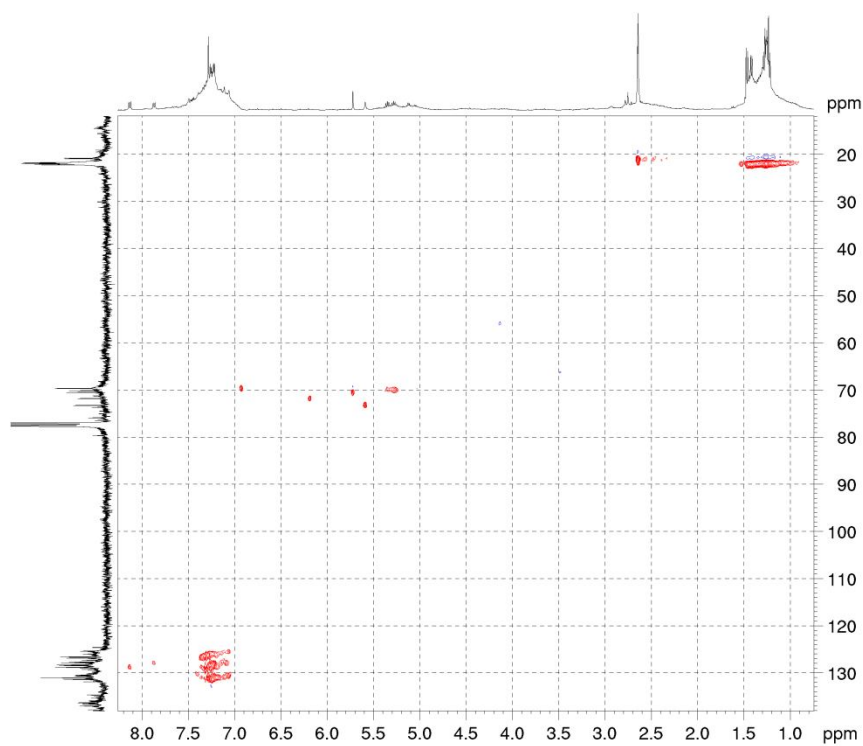

Figure 33. The HSQC spectrum of compound **6** (400.13 MHz for  $^1\text{H}$ , 100.62 MHz for  $^{13}\text{C}$ , solvent  $\text{CS}_2 : \text{CDCl}_3 = 5:1$ )

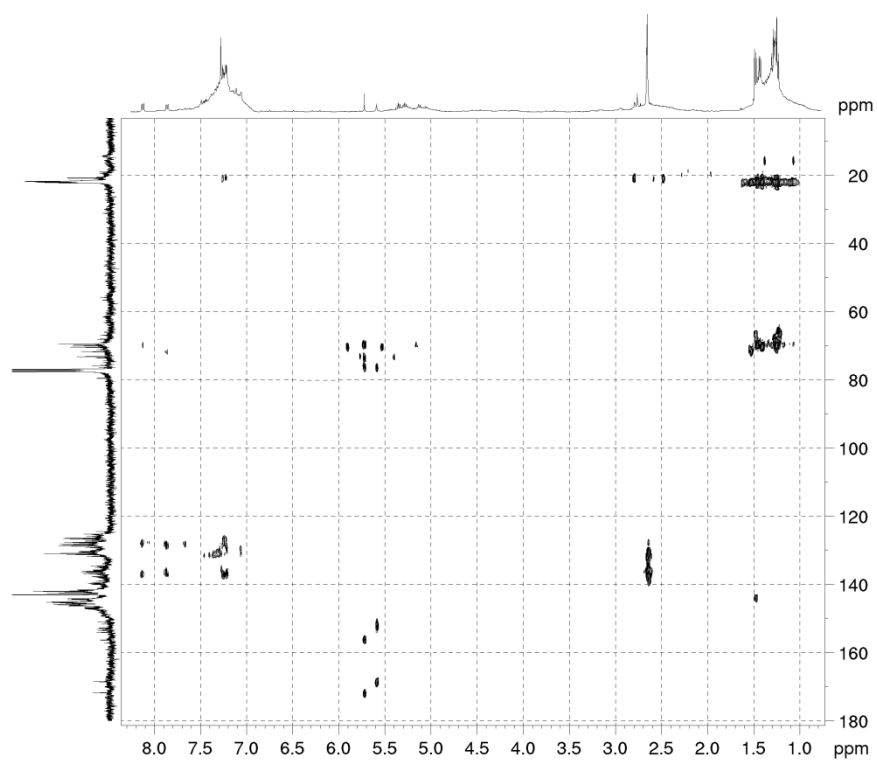

Figure 34. The HMBC spectrum of compound **6** (500.17 MHz for  $^1\text{H}$ , 125.78 MHz for  $^{13}\text{C}$ , solvent  $\text{CS}_2 : \text{CDCl}_3 = 5:1$ )
